# Supplementary material for: FastClone is a probabilistic tool for deconvoluting tumor heterogeneity in bulk-sequencing samples
Source: PubMed Central journal article supplement (PMC7478963; doi:10.1038/s41467-020-18169-2), 2020-09-08
Supplement: 41467_2020_18169_MOESM3_ESM.pdf [file 41467_2020_18169_MOESM3_ESM.pdf]

## **Description of Additional Supplementary Files**

File Name: Supplementary Software 1

Description: FastClone. The code of FastClone also comes with this manuscript. You can also download it and install it by using the command `<pip install FastClone_GuanLab/>`.
